# Supplementary material for: Three People Can Synchronize as Coupled Oscillators during Sports Activities
Source: PubMed Central journal article supplement (PMC3188505; doi:10.1371/journal.pcbi.1002181), 2011-10-06

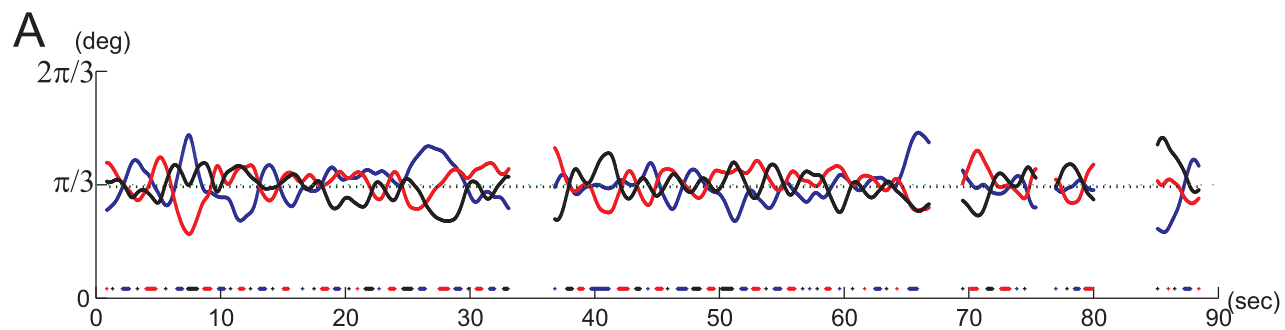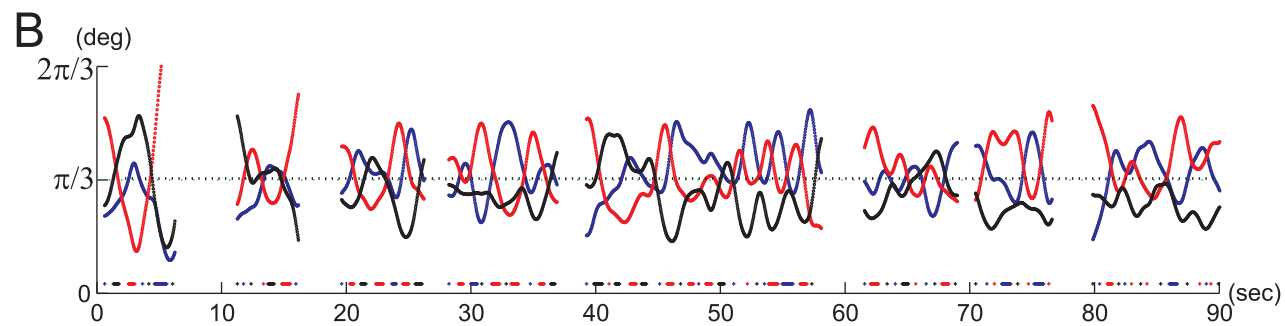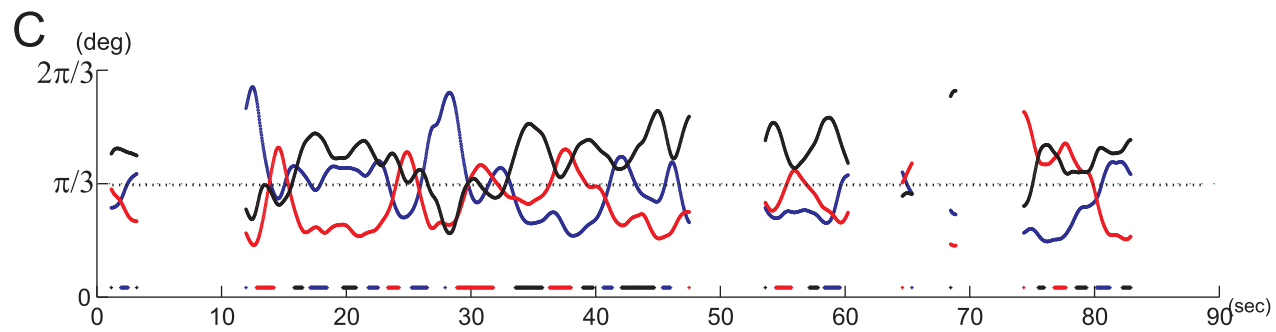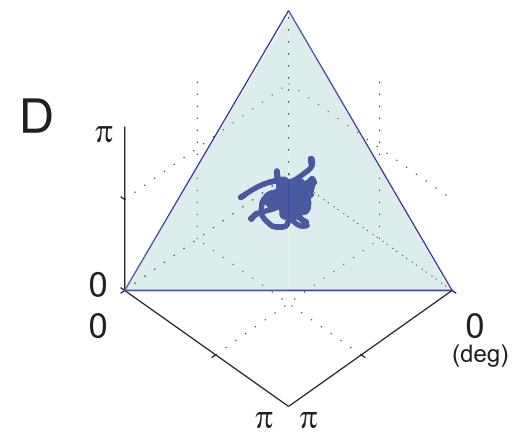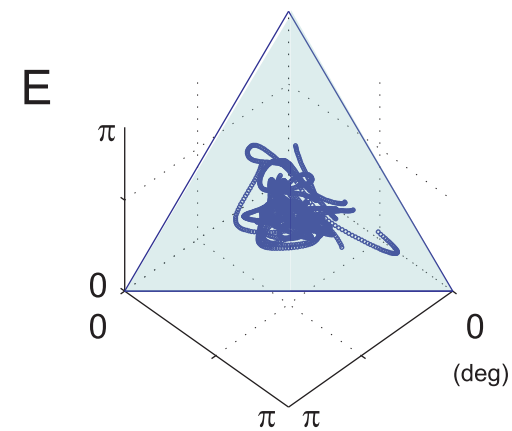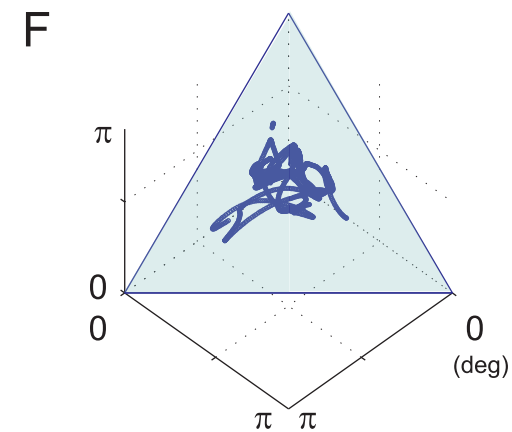

Supplement: pcbi.1002181.s001.pdf [file pcbi.1002181.s001.pdf]
