# Supplementary material for: Three People Can Synchronize as Coupled Oscillators during Sports Activities
Source: PubMed Central journal article supplement (PMC3188505; doi:10.1371/journal.pcbi.1002181), 2011-10-06
Supplement: pcbi.1002181.s005.pdf [file pcbi.1002181.s005.pdf]

## Table S1

Table 1:

| Pattern | $R$   | $PA$  | $PI$ | $PA'$ | $PI'$ | Other | Total |
|---------|-------|-------|------|-------|-------|-------|-------|
| High    | 162.2 | 124.4 | 66.5 | 340.2 | 2.5   | 280.6 | 976.4 |
| Low     | 68.1  | 75.7  | 50.3 | 170.0 | 2.8   | 156.3 | 523.1 |

(sec)
